# Supplementary material for: Counties with Lower Insurance Coverage and Housing Problems Are Associated with Both Slower Vaccine Rollout and Higher COVID-19 Incidence
Source: MDPI journal article supplement (doi:10.3390/vaccines9090973), 2021-08-31
Supplement: s1 [file s1]

## Supplementary Materials

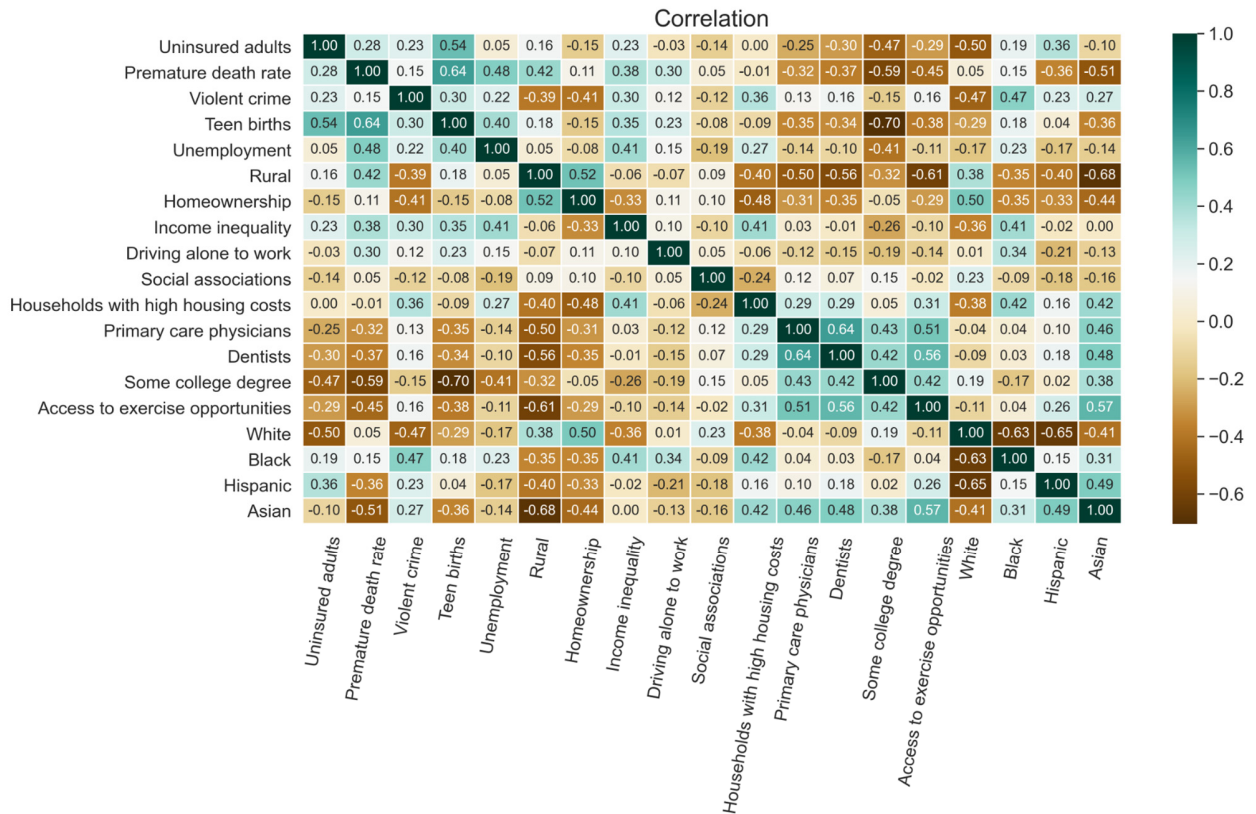

**Figure S1. Heatmap of Spearman's rank correlation for selected county-level features.** For each pair of features, Spearman rank correlation = +1 (dark green) corresponds to a perfectly monotonically increasing relationship, and Spearman rank correlation = -1 (dark orange) corresponds to a perfectly monotonically decreasing relationship. Correlation values are calculated based upon data available from the 3,087 counties in the study dataset, and features for each county include: demographic and socioeconomic variables, cumulative vaccinated percentage through June 6, 2021, and COVID-19 increase in incidence from December 1, 2020 to June 6, 2021.

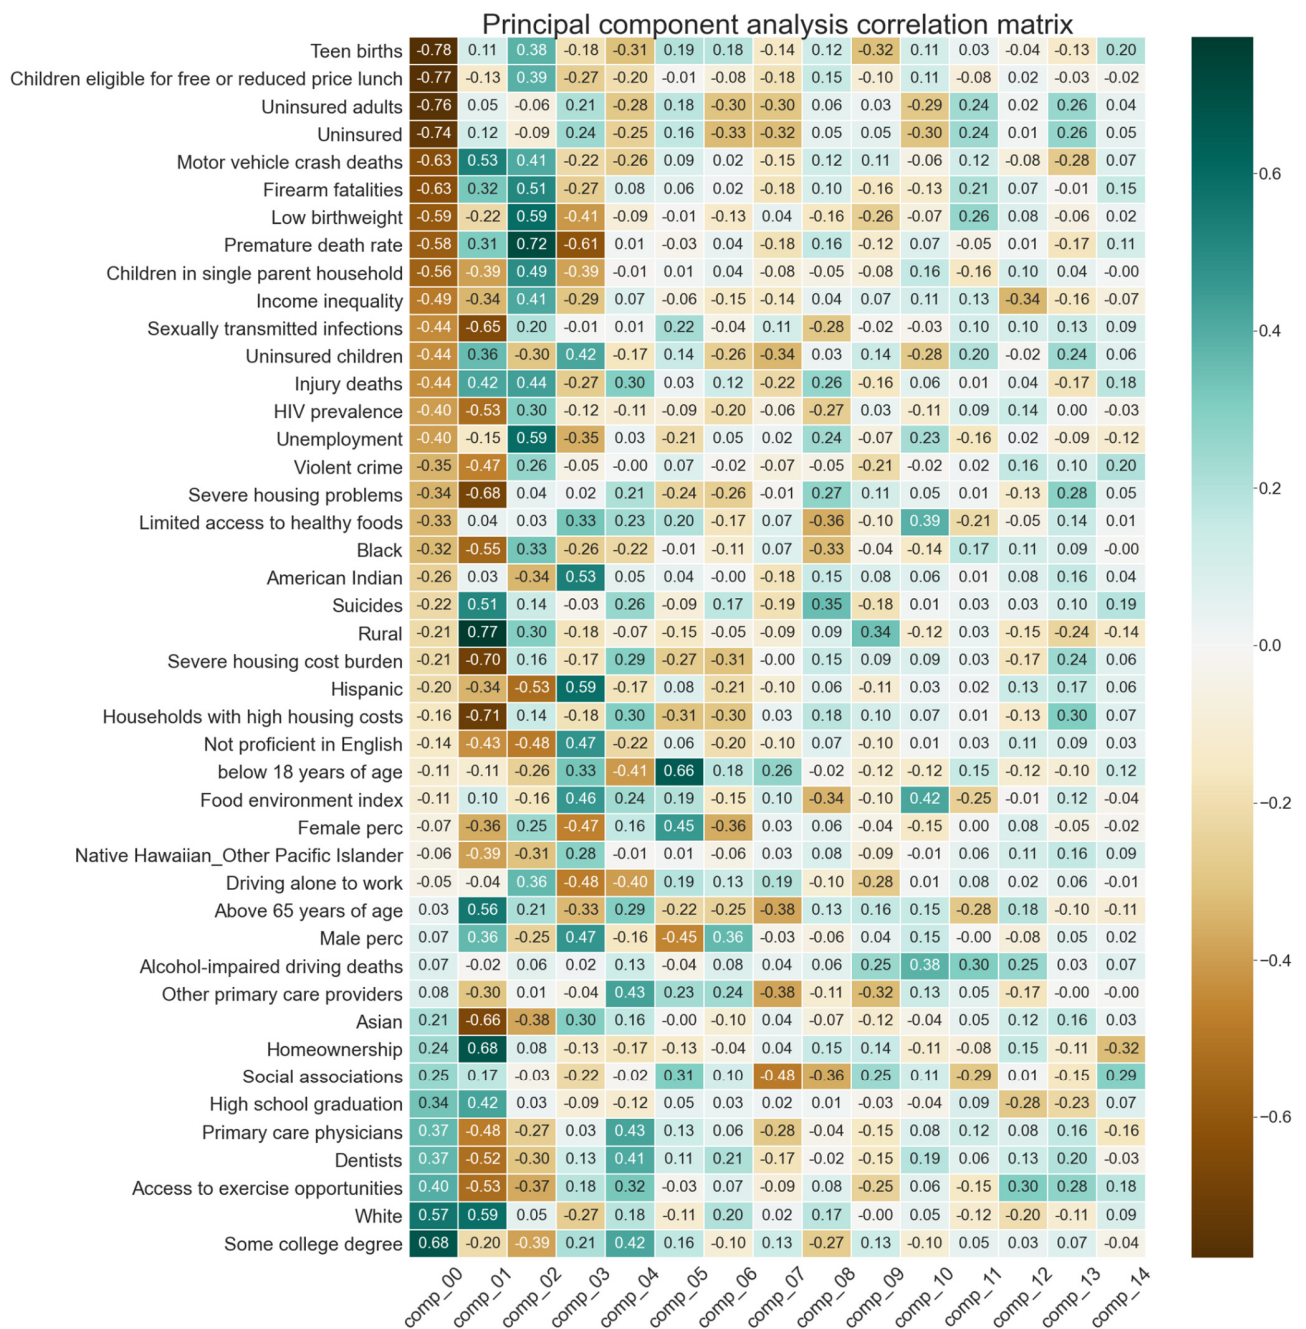

**Figure S2: Correlation matrix between principal components and county-level features.** The above correlation matrix shows correlation of each county-level feature with principal components. Rows correspond to socioeconomic features of the counties, and columns correspond to the principal components. In each cell, the Spearman rank correlation between the feature and the principal component is shown. The rows are sorted based upon the correlation with the first principal component, showing which features encode the most variability in the data.

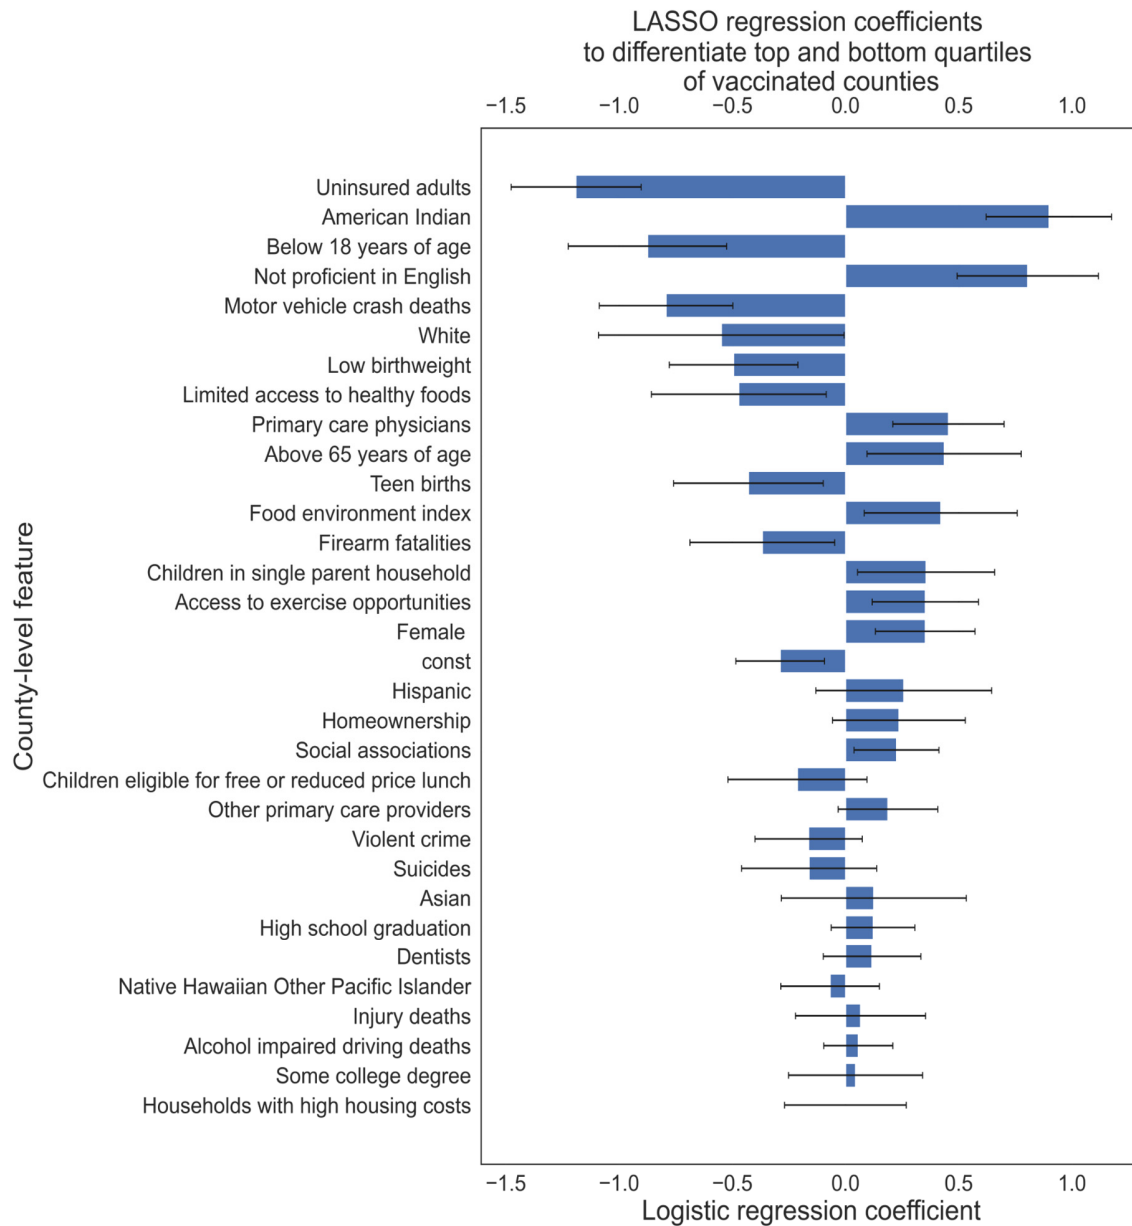

**Figure S3: LASSO logistic regression coefficients and confidence intervals.** The outcome variable for this LASSO logistic regression model is  $Y=1$  if the county is in the top vaccinated quartile, and  $Y=0$  if the county is in the bottom vaccinated quartile. All 44 socioeconomic factors were included as features for this LASSO model (normalized to have unit standard deviation), however only 31 were selected to have non-zero coefficients by the model, which are shown in the plot above. For each of these features, the magnitude of the coefficient is shown along with error bars indicating the 95% confidence interval.

**Table S1. Top 25 US Counties ranked by percent of uninsured population.** Information on state, county, percent uninsured, percent vaccinated, increase in COVID-incidence per 100,000 people as of June 6, 2021 relative to December 1, 2020, percent rural, population and percent male are provided for each county.

| Uninsured Rank | State | County               | % Uninsured | % Vaccinated | COVID incidence increase (per 100k) from Dec 1 to Jun 6 | % Rural | Population | % Male |
|----------------|-------|----------------------|-------------|--------------|---------------------------------------------------------|---------|------------|--------|
| 1              | Texas | Gaines County        | 33.7        | 13.5         | -181.5                                                  | 63.0    | 21,492     | 50.6   |
| 2              | Texas | Collingsworth County | 32.7        | 24.2         | -68.5                                                   | 100.0   | 2,920      | 49.0   |
| 3              | Texas | Briscoe County       | 31.4        | 29.1         | -64.7                                                   | 100.0   | 1,546      | 49.7   |
| 4              | Texas | Hidalgo County       | 31.2        | 44.0         | -203.2                                                  | 5.1     | 868,707    | 49.0   |
| 5              | Texas | Dallam County        | 30.5        | 26.8         | -13.7                                                   | 23.5    | 7,287      | 52.6   |
| 6              | Texas | Sherman County       | 29.6        | 22.9         | N/A                                                     | 100.0   | 3,022      | 52.2   |
| 7              | Texas | Lipscomb County      | 29.5        | 22.9         | -402.1                                                  | 100.0   | 3,233      | 51.1   |
| 8              | Texas | Jeff Davis County    | 29.4        | 42.9         | -1231.3                                                 | 100.0   | 2,274      | 51.2   |
| 9              | Texas | Zapata County        | 29.2        | 41.0         | -550.1                                                  | 23.5    | 14,179     | 49.7   |
| 10             | Texas | Presidio County      | 29.0        | 63.6         | -2759.5                                                 | 40.5    | 6,704      | 51.3   |
| 11             | Texas | Cameron County       | 29.0        | 46.2         | -90.7                                                   | 8.4     | 423,163    | 48.8   |
| 12             | Texas | San Saba County      | 28.9        | 21.9         | -181.7                                                  | 49.4    | 6,055      | 54.2   |
| 13             | Texas | Starr County         | 28.9        | 51.1         | -111.4                                                  | 23.7    | 64,633     | 48.8   |
| 14             | Texas | Castro County        | 28.9        | 25.2         | -252.3                                                  | 45.8    | 7,530      | 51.3   |
| 15             | Texas | Parmer County        | 28.7        | 27.9         | -270.7                                                  | 60.0    | 9,605      | 51.7   |
| 16             | Texas | Ochiltree County     | 28.6        | 27.6         | -569.3                                                  | 13.9    | 9,836      | 50.2   |
| 17             | Texas | Webb County          | 28.6        | 48.4         | -388.9                                                  | 2.6     | 276,652    | 49.2   |

|    |         |                           |      |      |         |       |        |      |
|----|---------|---------------------------|------|------|---------|-------|--------|------|
| 18 | Texas   | Hudspeth<br>County        | 28.5 | 45.9 | -2005.7 | 100.0 | 4,886  | 53.1 |
| 19 | Texas   | Cochran<br>County         | 28.5 | 27.1 | -35.1   | 100.0 | 2,853  | 50.7 |
| 20 | Texas   | Mason<br>County           | 28.1 | 35.4 | 117.0   | 100.0 | 4,274  | 51.1 |
| 21 | Alaska  | Aleutians<br>East Borough | 27.9 | 63.2 | -329.6  | 100.0 | 3,337  | 67.5 |
| 22 | Texas   | Terrell<br>County         | 27.7 | 38.4 | -1546.4 | 100.0 | 776    | 50.4 |
| 23 | Texas   | Moore<br>County           | 27.7 | 29.3 | -191.0  | 16.8  | 20,940 | 51.9 |
| 24 | Georgia | Echols<br>County          | 27.6 | 18.2 | -249.6  | 100.0 | 4,006  | 51.8 |
| 25 | Texas   | Cottle<br>County          | 27.4 | 28.6 | -286.1  | 100.0 | 1,398  | 48.7 |

**Table S2: LASSO logistic regression coefficients to differentiate top and bottom quartile vaccinated counties.** The outcome variable for this LASSO logistic regression model is Y=1 if the county is in the top vaccinated quartile, and Y=0 if the county is in the bottom vaccinated quartile. All 44 socioeconomic factors were included as features for this LASSO model (normalized to have unit standard deviation), however only 31 were selected to have non-zero coefficients by the model, which are presented in the table below. For each of these features, the following are presented: (1) coefficient of the feature in the logistic regression model along with the associated 95% confidence interval (CI), (2) Odds ratio of the feature in the logistic regression model along with the associated 95% CI, and (3) p-value for the feature in the logistic regression model. Rows are sorted by coefficients of regression.

| County-level feature                              | Coefficient (95% CI)    | Odds ratio (95% CI)  | p-value |
|---------------------------------------------------|-------------------------|----------------------|---------|
| Uninsured adults                                  | -1.190 (-1.477, -0.902) | 0.304 (0.228, 0.406) | <0.001  |
| Below 18 years of age                             | -0.874 (-1.224, -0.525) | 0.417 (0.294, 0.592) | <0.001  |
| Motor vehicle crash deaths                        | -0.792 (-1.087, -0.498) | 0.453 (0.337, 0.608) | <0.001  |
| White                                             | -0.548 (-1.091, -0.006) | 0.578 (0.336, 0.994) | 0.048   |
| Low birthweight                                   | -0.494 (-0.778, -0.210) | 0.610 (0.459, 0.811) | 0.001   |
| Limited access to healthy foods                   | -0.471 (-0.857, -0.085) | 0.624 (0.424, 0.919) | 0.017   |
| Teen births                                       | -0.429 (-0.760, -0.098) | 0.651 (0.468, 0.907) | 0.011   |
| Firearm fatalities                                | -0.367 (-0.687, -0.048) | 0.693 (0.503, 0.953) | 0.024   |
| const                                             | -0.288 (-0.484, -0.093) | 0.750 (0.616, 0.911) | 0.004   |
| Children eligible for free or reduced price lunch | -0.213 (-0.520, 0.094)  | 0.808 (0.595, 1.099) | 0.174   |
| Violent crime                                     | -0.163 (-0.400, 0.074)  | 0.850 (0.670, 1.077) | 0.179   |
| Suicides                                          | -0.161 (-0.459, 0.137)  | 0.851 (0.632, 1.147) | 0.29    |
| Native Hawaiian Other Pacific Islander            | -0.068 (-0.286, 0.149)  | 0.934 (0.751, 1.161) | 0.537   |
| Households with high housing costs                | -0.001 (-0.269, 0.268)  | 0.999 (0.764, 1.307) | 0.997   |
| Some college degree                               | 0.044 (-0.252, 0.340)   | 1.045 (0.777, 1.405) | 0.771   |
| Alcohol impaired driving deaths                   | 0.056 (-0.096, 0.209)   | 1.058 (0.908, 1.232) | 0.468   |

|                                     |                       |                      |        |
|-------------------------------------|-----------------------|----------------------|--------|
| Injury deaths                       | 0.066 (-0.221, 0.353) | 1.068 (0.802, 1.423) | 0.652  |
| Dentists                            | 0.116 (-0.099, 0.332) | 1.123 (0.906, 1.394) | 0.29   |
| High school graduation              | 0.122 (-0.063, 0.306) | 1.13 (0.939, 1.358)  | 0.197  |
| Asian                               | 0.124 (-0.284, 0.533) | 1.132 (0.753, 1.704) | 0.55   |
| Other primary care providers        | 0.187 (-0.033, 0.407) | 1.206 (0.968, 1.502) | 0.096  |
| Social associations                 | 0.225 (0.038, 0.412)  | 1.252 (1.039, 1.510) | 0.019  |
| Homeownership                       | 0.236 (-0.058, 0.529) | 1.266 (0.944, 1.697) | 0.116  |
| Hispanic                            | 0.257 (-0.131, 0.645) | 1.293 (0.877, 1.906) | 0.194  |
| Female                              | 0.352 (0.132, 0.571)  | 1.422 (1.141, 1.770) | 0.002  |
| Access to exercise opportunities    | 0.352 (0.117, 0.587)  | 1.422 (1.124, 1.799) | 0.003  |
| Children in single parent household | 0.355 (0.053, 0.658)  | 1.426 (1.054, 1.931) | 0.021  |
| Food environment index              | 0.420 (0.083, 0.758)  | 1.522 (1.087, 2.134) | 0.015  |
| Above 65 years of age               | 0.435 (0.095, 0.775)  | 1.545 (1.100, 2.171) | 0.012  |
| Primary care physicians             | 0.454 (0.209, 0.700)  | 1.575 (1.232, 2.014) | <0.001 |
| Not proficient in English           | 0.804 (0.492, 1.116)  | 2.234 (1.636, 3.053) | <0.001 |
| American Indian                     | 0.898 (0.621, 1.174)  | 2.455 (1.861, 3.235) | <0.001 |
